# Supplementary material for: Colorful semitransparent polymer solar cells employing a bottom periodic one-dimensional photonic crystal and a top conductive PEDOT:PSS layer
Source: Royal Society of Chemistry journal article supplement (doi:10.1039/c6ta05249e), 2016-01-01
Supplement: c6ta05249e1.pdf [file c6ta05249e1.pdf]

Electronic Supporting Information for:  
**Colorful semitransparent polymer solar cells employing  
a bottom periodic one-dimensional photonic crystal  
and a top conductive PEDOT:PSS layer**

Yangdong Zhang,<sup>a</sup> Zuosheng Peng,<sup>a</sup> Chaosheng Cai,<sup>a</sup> Zhe Liu,<sup>a</sup> Yuanbao  
Lin,<sup>a</sup> Wenhao Zheng,<sup>a</sup> Junyu Yang,<sup>a</sup> Lintao Hou\*<sup>a</sup> and Yong Cao<sup>b</sup>

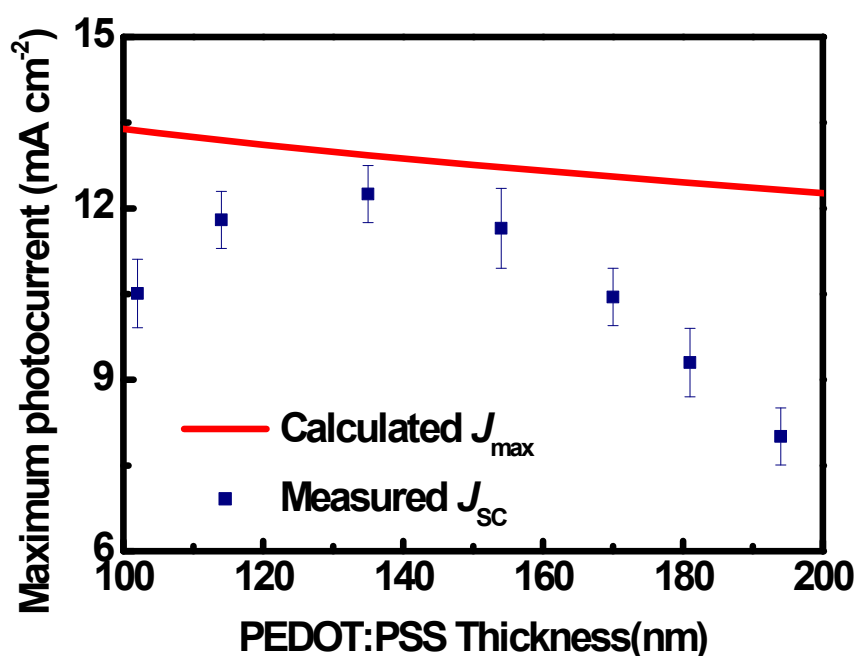

**Fig. S1** Dependence of the calculated and experimental  $J_{SC}$  of Type 2a device as a function of PEDOT:PSS thickness. The error bars represent the standard deviation in measurements.

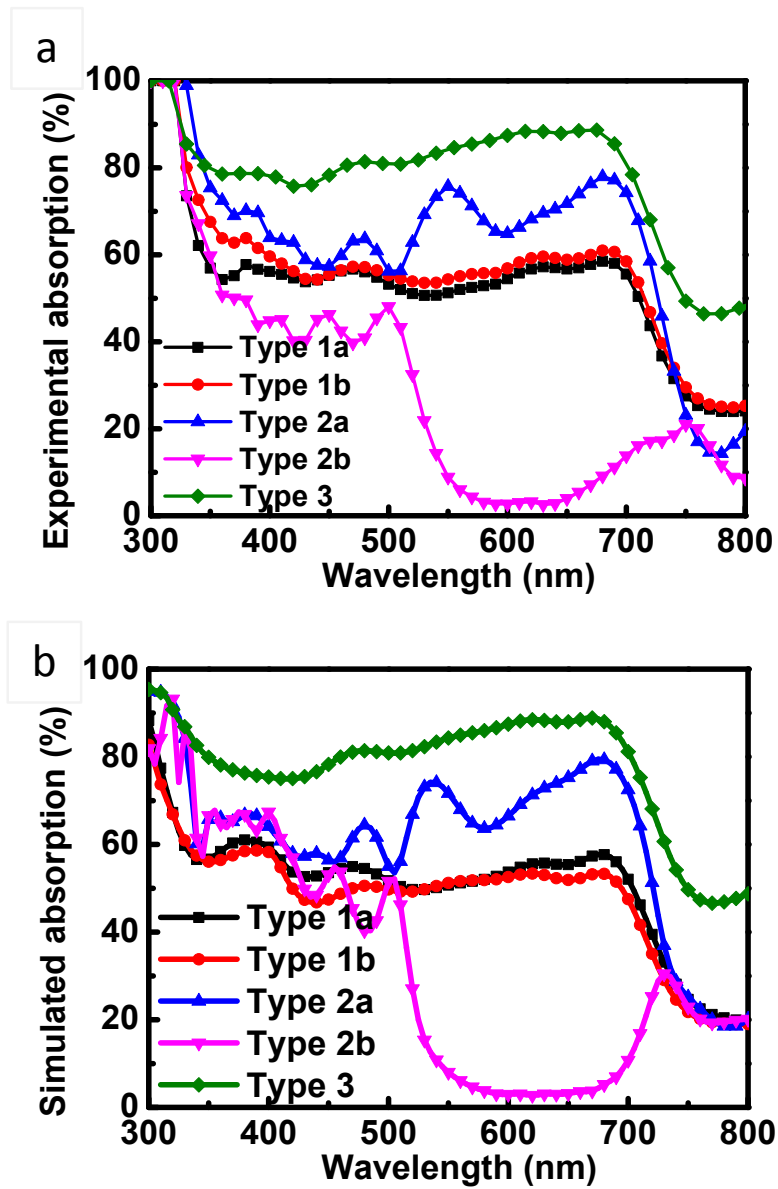

**Fig. S2** Experimental (a) and simulated (b) absorption of three types of solar cells.
